# Supplementary material
Source: ML conference proceedings conference paper supplement (https://openaccess.thecvf.com/content/ICCV2021/html/Zeng_PR-RRN_Pairwise-Regularized_Residual-Recursive_ICCV_2021_paper.html)
Supplement: Supplementary file 2 [file Zeng_PR-RRN_Pairwise-Regularized_Residual-Recursive_ICCV_2021_supplemental.zip]

Archive with 4 entries (4 files):
- Supplementary_2139.pdf
- __MACOSX/._Supplementary_2139.pdf
- Visualization_mocap_33.mp4
- __MACOSX/._Visualization_mocap_33.mp4
